# Supplementary material for: Study on the synthesis and tribological properties of anti-corrosion benzotriazole ionic liquid
Source: Royal Society of Chemistry journal article supplement (doi:10.1039/c6ra27376a), 2017-01-01
Supplement: c6ra27376a1.pdf [file c6ra27376a1.pdf]

## Supplementary Information

### Study on the Synthesis and Tribological Properties of Anti-corrosion

#### Benzotriazole Ionic Liquid

S. Zhang,<sup>a</sup> L. Ma<sup>a</sup>, R. Dong,<sup>a</sup> C. Y. Zhang,<sup>a</sup> W. J. Sun,<sup>a</sup> M. J. Fan,<sup>a\*</sup> D. S. Yang,<sup>a\*</sup> F. Zhou<sup>b</sup> and W. M. Liu<sup>b</sup>

<sup>a</sup>Shaanxi Key Laboratory of Phytochemistry, College of Chemistry & Chemical Engineering, Baoji University of Arts and Sciences, Baoji 721013, China

<sup>b</sup>State Key Laboratory of Solid Lubrication, Lanzhou Institute of Chemical Physics, Chinese Academy of Sciences, Lanzhou 730000, China

The synthesis of IL BTAP<sub>4444</sub> as follows: BTAH was mixed with equal molar amount of P<sub>4444</sub>OH, which was stirred at RT for 24 h. Then, dichloromethane (DCM) was added into the reaction mixture to extract the coarse IL product, and the DCM extractant was washed three times with distilled water to remove the non-reactant material and water soluble byproducts. DCM was removed by rotary evaporator. Finally the solution residue was further purified by vacuum drying at 70 °C for 24 h. After these steps, the target IL BTAP<sub>4444</sub> was obtained successfully.

The structure and purity of BTAP<sub>4444</sub> was finely confirmed by <sup>1</sup>H NMR, <sup>13</sup>C NMR, FT-IR and HRMS spectroscopic data. The detail data are presented below:

BTAP<sub>4444</sub>: <sup>1</sup>H NMR (400 MHz, CDCl<sub>3</sub>) δ (ppm), 7.76 (d, *J*=8.0 Hz, 2 H), 6.98 (dd, *J*=8.0, 4.0 Hz, 2 H), 1.78 (t, *J*=16.0 Hz, 8 H), 1.38-1.18 (m, 16 H), 0.85 (t, *J*=8.0 Hz, 12 H). <sup>13</sup>C NMR (100 MHz, CDCl<sub>3</sub>) δ (ppm), 145.44, 120.18, 116.23, 23.74, 23.59, 23.40, 23.35, 18.32, 17.85, 13.32.

FT-IR (neat, cm<sup>-1</sup>): 2960, 2930, 2867, 1648, 1275, 740.

HRMS: *m/z* (ESI, positive ion) calc. 259.2555, found 259.2554 [C<sub>16</sub>H<sub>36</sub>P<sup>+</sup>], *m/z* (ESI, negative ion) calc. 118.0405, found 118.0408 [C<sub>6</sub>H<sub>4</sub>N<sub>3</sub><sup>-</sup>].

The 3D optical microscopic images were shown as following which were consistent with the wear scars obtained during the sliding process.

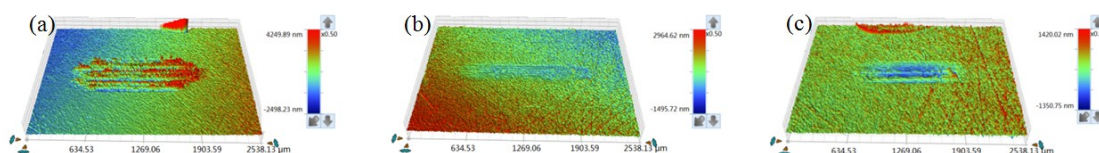

Fig. S1 The 3D optical microscopic images of wear scars (steel/steel friction pairs) after the friction tests at RT.

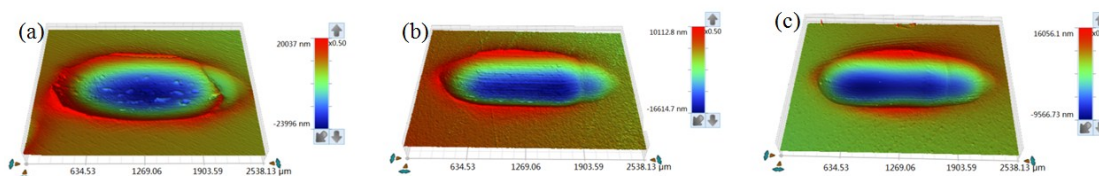

Fig. S2 The 3D optical microscopic images of wear scars (copper/steel friction pairs) after the friction tests at RT.

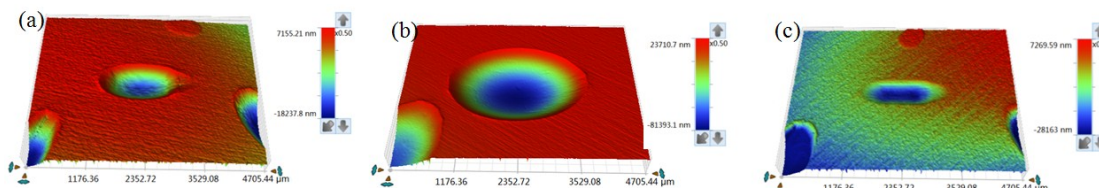

Fig. S3 The 3D optical microscopic images of wear scars (aluminum/steel friction pairs) after the friction tests at RT.

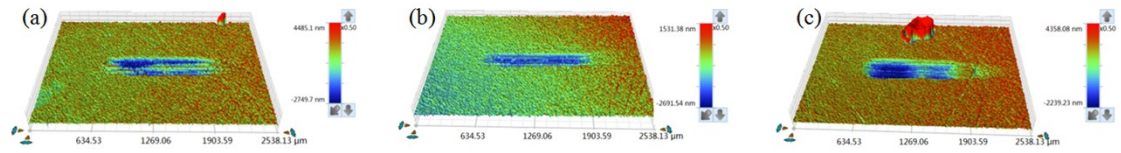

Fig. S4 The 3D optical microscopic images of wear scars (steel/steel friction pairs) after the friction tests at 100 °C.

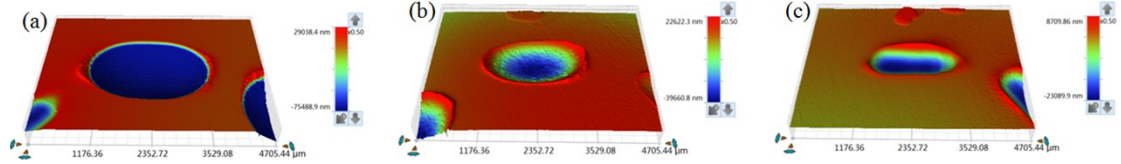

Fig. S5 The 3D optical microscopic images of wear scars (copper/steel friction pairs) after the friction tests at 100 °C.

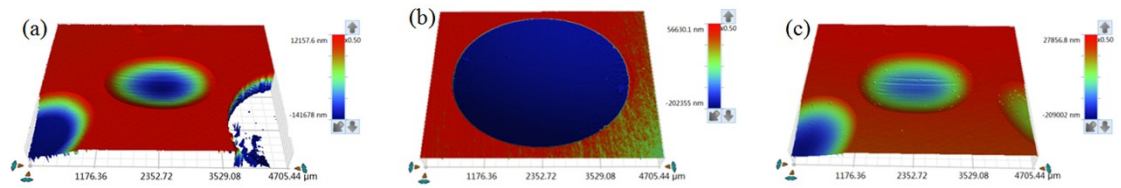

Fig. S6 The 3D optical microscopic images of wear scars (aluminum/steel friction pairs) after the friction tests at 100 °C.
